# Supplementary material
Source: MDPI journal article supplement (https://www.mdpi.com/2673-8449/3/3/11)
Supplement: s1 [file s1]

## Supplemental Data

**Supplemental Table S1.** List of classified fusions along with prevalence reported by tumor site \*.

| Specimen Type                     | Gene Fusion               | # of patients |                |
|-----------------------------------|---------------------------|---------------|----------------|
|                                   |                           | with fusion   | Prevalence (%) |
| Prostatic adenocarcinoma (N = 89) | <i>TMPRSS2-ERG</i>        | 18            | 20.22%         |
|                                   | <i>TMPRSS2-ETV4</i>       | 1             | 1.12%          |
|                                   | <i>TMPRSS2-RUNX1</i>      | 1             | 1.12%          |
|                                   | <i>TMPRSS2-ETV1</i>       | 1             | 1.12%          |
|                                   | <i>FOXP1-RALGAPB</i>      | 1             | 1.12%          |
|                                   | <i>GPS2-WRAP53</i>        | 1             | 1.12%          |
|                                   | <i>FOXP1-ATP5L</i>        | 1             | 1.12%          |
|                                   | <i>QSOX1-ABL2</i>         | 1             | 1.12%          |
|                                   | <i>PTEN-PANK1</i>         | 1             | 1.12%          |
|                                   | <i>PTEN-KCTD8</i>         | 1             | 1.12%          |
|                                   | <i>ARID1B-PDE10A</i>      | 1             | 1.12%          |
|                                   | <i>SUFU-ADK</i>           | 1             | 1.12%          |
|                                   | <i>SUFU-SAMD8</i>         | 1             | 1.12%          |
|                                   | <i>FUBP1-ACOT7</i>        | 1             | 1.12%          |
|                                   | <i>CD58-PBX1</i>          | 1             | 1.12%          |
|                                   | <i>ACSL3-ETV1</i>         | 1             | 1.12%          |
|                                   | <i>SETD2-LOC101928323</i> | 1             | 1.12%          |
|                                   | <i>SETD2-FHIT</i>         | 1             | 1.12%          |
|                                   | <i>DECR1-NRG1</i>         | 1             | 1.12%          |
|                                   | <i>SUZ12-RNF213</i>       | 1             | 1.12%          |
|                                   | <i>YAF2-RYBP</i>          | 1             | 1.12%          |
|                                   | <i>ARF4-KMT2A</i>         | 1             | 1.12%          |
|                                   | <i>SPOP-FAM117A</i>       | 1             | 1.12%          |
|                                   | <i>YWHAZ-SMAD2</i>        | 1             | 1.12%          |
|                                   | <i>KDM6A-RANBP17</i>      | 1             | 1.12%          |
|                                   | <i>EP400-RCSD1</i>        | 1             | 1.12%          |
|                                   | <i>ITGA9-MLH1</i>         | 1             | 1.12%          |
|                                   | <i>ATP5L-FOXP1</i>        | 1             | 1.12%          |
|                                   | <i>IGF2BP1-TP53</i>       | 1             | 1.12%          |
|                                   | <i>LMAN2-TP53</i>         | 1             | 1.12%          |
|                                   | <i>SLC45A3-ERG</i>        | 1             | 1.12%          |
|                                   | <b>Total</b>              | <b>48</b>     | <b>53.93%</b>  |
| Uterine sarcoma (N = 62)          | <i>YAF2-RYBP</i>          | 4             | 6.44%          |
|                                   | <i>EPC1-EED</i>           | 2             | 3.22%          |
|                                   | <i>CCDC157-EWSR1</i>      | 1             | 1.61%          |
|                                   | <i>ERBB4-FN1</i>          | 1             | 1.61%          |
|                                   | <i>JAZF1-SUZ12</i>        | 1             | 1.61%          |

|                      |           |               |
|----------------------|-----------|---------------|
| <i>MECOM-LRRC31</i>  | 1         | 1.61%         |
| <i>MECOM-LRRC34</i>  | 1         | 1.61%         |
| <i>MECOM-SGCG</i>    | 1         | 1.61%         |
| <i>NCAPD2-SPOP</i>   | 1         | 1.61%         |
| <i>UBAP2-ARID4B</i>  | 1         | 1.61%         |
| <i>ESR1-LMO3</i>     | 1         | 1.61%         |
| <i>LPP-RAF1</i>      | 1         | 1.61%         |
| <i>ABL1-NCS1</i>     | 1         | 1.61%         |
| <i>AXIN1-TMEM8A</i>  | 1         | 1.61%         |
| <i>TFDP2-ATR</i>     | 1         | 1.61%         |
| <i>XRCC5-BARD1</i>   | 1         | 1.61%         |
| <i>POC1A-BAP1</i>    | 1         | 1.61%         |
| <i>COL1A1-PDGFB</i>  | 1         | 1.61%         |
| <i>NF1-BBS4</i>      | 1         | 1.61%         |
| <i>KMT2B-STARD10</i> | 1         | 1.61%         |
| <i>SMARCA4-CARM1</i> | 1         | 1.61%         |
| <b>Total</b>         | <b>25</b> | <b>40.32%</b> |

Esophageal and Esophagogastric Junction  
Cancers (N = 37)

|                        |           |               |
|------------------------|-----------|---------------|
| <i>FGFR2-NRAP</i>      | 1         | 2.70%         |
| <i>ZFHX3-LINC01572</i> | 1         | 2.70%         |
| <i>FBXL20-CDK12</i>    | 1         | 2.70%         |
| <i>RARA-LRRC20</i>     | 1         | 2.70%         |
| <i>KIF13B-DUSP4</i>    | 1         | 2.70%         |
| <i>ITSN1-RUNX1</i>     | 1         | 2.70%         |
| <i>CDKN2A-NEK6</i>     | 1         | 2.70%         |
| <i>ERF-IMPG1</i>       | 1         | 2.70%         |
| <i>TRAF7-CREBBP</i>    | 1         | 2.70%         |
| <i>P3H2-MECOM</i>      | 1         | 2.70%         |
| <b>Total</b>           | <b>11</b> | <b>29.73%</b> |

Breast cancer (N = 224)

|                     |   |       |
|---------------------|---|-------|
| <i>YAF2-RYBP</i>    | 4 | 1.80% |
| <i>DDX5-AXIN2</i>   | 1 | 0.45% |
| <i>SPOP-ANKFN1</i>  | 1 | 0.45% |
| <i>DDX5-CDC73</i>   | 1 | 0.45% |
| <i>RB1-RBM47</i>    | 1 | 0.45% |
| <i>CDH1-ANKRD28</i> | 1 | 0.45% |
| <i>FGFR2-NKX1-2</i> | 1 | 0.45% |
| <i>ANKRD28-CDH1</i> | 1 | 0.45% |
| <i>COIL-BRIP1</i>   | 1 | 0.45% |
| <i>SAYS1-MAP3K1</i> | 1 | 0.45% |
| <i>TANC2-BRIP1</i>  | 1 | 0.45% |
| <i>RARA-PIPOX</i>   | 1 | 0.45% |
| <i>RARA-CASC3</i>   | 1 | 0.45% |

|                       |   |       |
|-----------------------|---|-------|
| <i>FOXP1-DLGAP1</i>   | 1 | 0.45% |
| <i>ARID1B-VPS13D</i>  | 1 | 0.45% |
| <i>GTF2I-SRRM3</i>    | 1 | 0.45% |
| <i>ABL1-FUBP3</i>     | 1 | 0.45% |
| <i>BMPR1A-SARNP</i>   | 1 | 0.45% |
| <i>ARID5B-TSPAN14</i> | 1 | 0.45% |
| <i>ZNF814-FOXO1</i>   | 1 | 0.45% |
| <i>SCAF4-ERG</i>      | 1 | 0.45% |
| <i>CREBBP-FGD4</i>    | 1 | 0.45% |
| <i>TP53BP1-STRC</i>   | 1 | 0.45% |
| <i>SUZ12P1-CDK12</i>  | 1 | 0.45% |
| <i>AHI1-ESR1</i>      | 1 | 0.45% |
| <i>PMP22-NCOR1</i>    | 1 | 0.45% |
| <i>ATXN1-PTPRD</i>    | 1 | 0.45% |
| <i>WRAP53-TP53</i>    | 1 | 0.45% |
| <i>GIN53-INPP4B</i>   | 1 | 0.45% |
| <i>BDP1-RAD50</i>     | 1 | 0.45% |
| <i>ESR1-AKAP12</i>    | 1 | 0.45% |
| <i>ESR1-PLEKHG1</i>   | 1 | 0.45% |
| <i>ESR1-ARN2</i>      | 1 | 0.45% |
| <i>ESR1-FGGY</i>      | 1 | 0.45% |
| <i>VHL-BRK1</i>       | 1 | 0.45% |
| <i>SPTBN2-LMO2</i>    | 1 | 0.45% |
| <i>SDHAF2-LRRC15</i>  | 1 | 0.45% |
| <i>INPPL1-PC</i>      | 1 | 0.45% |
| <i>PTPRS-CACNA1A</i>  | 1 | 0.45% |
| <i>KATNA1-LATS1</i>   | 1 | 0.45% |
| <i>PTPN2-C18orf61</i> | 1 | 0.45% |
| <i>SUZ12-CDK12</i>    | 1 | 0.45% |
| <i>RAPGEFL1-RUNX1</i> | 1 | 0.45% |

|              |           |               |
|--------------|-----------|---------------|
| <b>Total</b> | <b>46</b> | <b>20.54%</b> |
|--------------|-----------|---------------|

Bladder cancer (N = 74)

|                       |   |       |
|-----------------------|---|-------|
| <i>ZFH3-PKD1L3</i>    | 1 | 1.35% |
| <i>GTF2I-GTF2IRD1</i> | 1 | 1.35% |
| <i>NF1-NSF</i>        | 1 | 1.35% |
| <i>F11R-SDHC</i>      | 1 | 1.35% |
| <i>BCORL1-CASC15</i>  | 1 | 1.35% |
| <i>BCORL1-FGF13</i>   | 1 | 1.35% |
| <i>BCORL1-UTP14A</i>  | 1 | 1.35% |
| <i>MEMO1-NPM1</i>     | 1 | 1.35% |
| <i>CWF19L2-YAP1</i>   | 1 | 1.35% |
| <i>ATXN2-KCNJ6</i>    | 1 | 1.35% |
| <i>ATXN2-ACAD10</i>   | 1 | 1.35% |

|                                    |                       |           |               |
|------------------------------------|-----------------------|-----------|---------------|
|                                    | <i>BRD4-PTBP1</i>     | 1         | 1.35%         |
|                                    | <i>STAG2-GRIA3</i>    | 1         | 1.35%         |
|                                    | <i>ABL2-PPP2R5C</i>   | 1         | 1.35%         |
|                                    | <i>CDK16-RBM10</i>    | 1         | 1.35%         |
|                                    | <b>Total</b>          | <b>15</b> | <b>20.27%</b> |
| Soft tissue tumors (N = 93)        | <i>SS18-SSX2</i>      | 2         | 2.16%         |
|                                    | <i>ASXL2-MSH6</i>     | 1         | 1.08%         |
|                                    | <i>MDM2-KDM6A</i>     | 1         | 1.08%         |
|                                    | <i>ARID1B-DSE</i>     | 1         | 1.08%         |
|                                    | <i>SS18-SSX1</i>      | 1         | 1.08%         |
|                                    | <i>BMPR1A-LYPD5</i>   | 1         | 1.08%         |
|                                    | <i>NCOR1-DNAH2</i>    | 1         | 1.08%         |
|                                    | <i>AKT3-CEP170</i>    | 1         | 1.08%         |
|                                    | <i>RNF20-EPHA3</i>    | 1         | 1.08%         |
|                                    | <i>SLC25A3-BTG1</i>   | 1         | 1.08%         |
|                                    | <i>SDHA-ZDHHC11</i>   | 1         | 1.08%         |
|                                    | <i>MCM8-RAD51B</i>    | 1         | 1.08%         |
|                                    | <i>RAD50-TOM1L2</i>   | 1         | 1.08%         |
|                                    | <i>PAX3-FOXO1</i>     | 1         | 1.08%         |
|                                    | <i>SDCCAG8-AKT3</i>   | 1         | 1.08%         |
|                                    | <i>RASA1-SULF2</i>    | 1         | 1.08%         |
|                                    | <i>HMCN1-TP53</i>     | 1         | 1.08%         |
|                                    | <b>Total</b>          | <b>18</b> | <b>19.35%</b> |
| Cancer of unknown primary (N = 78) | <i>ARID1B-TMEM181</i> | 1         | 1.28%         |
|                                    | <i>BRD4-ILVBL</i>     | 1         | 1.28%         |
|                                    | <i>PTEN-PAPPA2</i>    | 1         | 1.28%         |
|                                    | <i>BMPR1A-LIPF</i>    | 1         | 1.28%         |
|                                    | <i>AXIN1-RFX1</i>     | 1         | 1.28%         |
|                                    | <i>CUX1-PINX1</i>     | 1         | 1.28%         |
|                                    | <i>FAT1-F11-AS1</i>   | 1         | 1.28%         |
|                                    | <i>AKT3-CEP170</i>    | 1         | 1.28%         |
|                                    | <i>FAM35A-PTEN</i>    | 1         | 1.28%         |
|                                    | <i>ZNF317-KEAP1</i>   | 1         | 1.28%         |
|                                    | <i>ATM-KMT5B</i>      | 1         | 1.28%         |
|                                    | <i>CDH1-NFAT5</i>     | 1         | 1.28%         |
|                                    | <i>ARID2-GLIPR1L2</i> | 1         | 1.28%         |
|                                    | <i>JAK2-INSL6</i>     | 1         | 1.28%         |
|                                    | <i>YAF2-RYBP</i>      | 1         | 1.28%         |
|                                    | <b>Total</b>          | <b>15</b> | <b>19.23%</b> |
| Cholangiocarcinoma (N = 42)        | <i>FGFR2-WAC</i>      | 1         | 2.38%         |
|                                    | <i>FGFR2-MKL2</i>     | 1         | 2.38%         |
|                                    | <i>RALY-DNMT3B</i>    | 1         | 2.38%         |

|                               |                            |          |               |
|-------------------------------|----------------------------|----------|---------------|
|                               | <i>SMAD3-IQCH</i>          | 1        | 2.38%         |
|                               | <i>SMAD3-LOC1202723481</i> | 1        | 2.38%         |
|                               | <i>ABL1-FUBP3</i>          | 1        | 2.38%         |
|                               | <i>MELK-PAX5</i>           | 1        | 2.38%         |
|                               | <i>BMP6-MGA</i>            | 1        | 2.38%         |
|                               | <b>Total</b>               | <b>8</b> | <b>19.05%</b> |
| Neuroendocrine tumor (N = 32) | <i>BRD4-AKAP8L</i>         | 1        | 3.13%         |
|                               | <i>RB1-CKAP2</i>           | 1        | 3.13%         |
|                               | <i>ARID2-OCIAD1</i>        | 1        | 3.13%         |
|                               | <i>USP22-BRD4</i>          | 1        | 3.13%         |
|                               | <i>PAX5-ASPA</i>           | 1        | 3.13%         |
|                               | <i>SMARCA4-SIL1</i>        | 1        | 3.13%         |
|                               | <b>Total</b>               | <b>6</b> | <b>18.75%</b> |
| Salivary gland tumor (N = 22) | <i>GTF2I-CDK6</i>          | 1        | 4.55%         |
|                               | <i>NFIB-MYB</i>            | 2        | 9.09%         |
|                               | <i>NTRK3-ETV6</i>          | 1        | 4.55%         |
|                               | <b>Total</b>               | <b>4</b> | <b>18.18%</b> |
| Ovarian cancer (N = 362)      | <i>YAF2-RYBP</i>           | 4        | 1.11%         |
|                               | <i>ESR1-CCDC170</i>        | 2        | 0.56%         |
|                               | <i>ASXL2-HADHA</i>         | 1        | 0.28%         |
|                               | <i>CREBBP-LOC652276</i>    | 1        | 0.28%         |
|                               | <i>CNN2-ARID3A</i>         | 1        | 0.28%         |
|                               | <i>KMT2C-LINC00358</i>     | 1        | 0.28%         |
|                               | <i>NFAT5-CDH1</i>          | 1        | 0.28%         |
|                               | <i>WBP1L-SUFU</i>          | 1        | 0.28%         |
|                               | <i>KMT2C-CNTNAP2</i>       | 1        | 0.28%         |
|                               | <i>PTPN1-PPARGC1B</i>      | 1        | 0.28%         |
|                               | <i>SNW1-ANKRD11</i>        | 1        | 0.28%         |
|                               | <i>SETD2-DFFA</i>          | 1        | 0.28%         |
|                               | <i>PPP1CB-ANKRD11</i>      | 1        | 0.28%         |
|                               | <i>EWSR1-HSCB</i>          | 1        | 0.28%         |
|                               | <i>RNF135-NF1</i>          | 1        | 0.28%         |
|                               | <i>LPAR2-BRD4</i>          | 1        | 0.28%         |
|                               | <i>RYBP-STAG2</i>          | 1        | 0.28%         |
|                               | <i>FANCD2-SETD5</i>        | 1        | 0.28%         |
|                               | <i>STARD3-RARA</i>         | 1        | 0.28%         |
|                               | <i>MECOM-TNIK</i>          | 1        | 0.28%         |
|                               | <i>GMEB2-TFE3</i>          | 1        | 0.28%         |
|                               | <i>MECOM-TBL1XR1</i>       | 1        | 0.28%         |
|                               | <i>MECOM-LRRC34</i>        | 1        | 0.28%         |
|                               | <i>SDHC-APC2</i>           | 1        | 0.28%         |

|                          |   |       |
|--------------------------|---|-------|
| <i>ESR1-MTHFD1L</i>      | 1 | 0.28% |
| <i>LOC100133091-CUX1</i> | 1 | 0.28% |
| <i>WNK1-DUSP22</i>       | 1 | 0.28% |
| <i>NF1-AKAIN1</i>        | 1 | 0.28% |
| <i>BRD4-CYP4F12</i>      | 1 | 0.28% |
| <i>BRD4-WDR43</i>        | 1 | 0.28% |
| <i>BRD4-DMBT1</i>        | 1 | 0.28% |
| <i>ERBB4-GTF3C3</i>      | 1 | 0.28% |
| <i>EIF4H-GTF2I</i>       | 1 | 0.28% |
| <i>ERBB4-UPB1</i>        | 1 | 0.28% |
| <i>ERBB4-DUSP19</i>      | 1 | 0.28% |
| <i>ERBB4-FNDC3B</i>      | 1 | 0.28% |
| <i>PTEN-SCRN3</i>        | 1 | 0.28% |
| <i>ASXL1-BICD1</i>       | 1 | 0.28% |
| <i>ASXL1-TM9SF4</i>      | 1 | 0.28% |
| <i>FUBP1-USP33</i>       | 2 | 0.55% |
| <i>PCM1-MET</i>          | 1 | 0.28% |
| <i>HRASLS-TP63</i>       | 1 | 0.28% |
| <i>PLCG1-TOP1</i>        | 1 | 0.28% |
| <i>ARID4B-SLC35F3</i>    | 1 | 0.28% |
| <i>CDH1-CTCF</i>         | 1 | 0.28% |
| <i>NPRL3-AXIN1</i>       | 1 | 0.28% |
| <i>MRPS35-RAD51</i>      | 1 | 0.28% |
| <i>MLLT10-ST6GALNAC4</i> | 1 | 0.28% |
| <i>MAPRE1-DNMT3B</i>     | 1 | 0.28% |
| <i>SCAF8-ESR1</i>        | 1 | 0.28% |
| <i>NAP1L4-SUFU</i>       | 1 | 0.28% |
| <i>ARHGAP21-MLLT10</i>   | 1 | 0.28% |
| <i>SMARCA4-PODNL1</i>    | 1 | 0.28% |
| <i>EED-RCOR1</i>         | 1 | 0.28% |
| <i>SMARCA4-MAST1</i>     | 1 | 0.28% |
| <i>KMT2B-YLPM1</i>       | 1 | 0.28% |
| <i>MTMR3-NF2</i>         | 1 | 0.28% |

|              |           |               |
|--------------|-----------|---------------|
| <b>Total</b> | <b>62</b> | <b>17.13%</b> |
|--------------|-----------|---------------|

Thyroid Carcinoma (N = 41)

|                    |   |       |
|--------------------|---|-------|
| <i>CCDC6-RET</i>   | 1 | 2.44% |
| <i>PICALM-BRAF</i> | 1 | 2.44% |
| <i>PAX8-PPARG</i>  | 1 | 2.44% |
| <i>MKRN1-PARK2</i> | 1 | 2.44% |
| <i>ABAT-NTRK1</i>  | 1 | 2.44% |
| <i>MACF1-BRAF</i>  | 1 | 2.44% |
| <i>DOCK9-FOXO1</i> | 1 | 2.44% |

|              |          |               |
|--------------|----------|---------------|
| <b>Total</b> | <b>7</b> | <b>17.07%</b> |
|--------------|----------|---------------|

|                          |                  |           |               |
|--------------------------|------------------|-----------|---------------|
| Thymic carcinoma (N = 6) | LYPLAL1-AKT3     | 1         | 16.67%        |
|                          | <b>Total</b>     | <b>1</b>  | <b>16.67%</b> |
| Glioblastoma (N = 220)   | EGFR-SEPT14      | 1         | 0.45%         |
|                          | FGFR3-TACC3      | 3         | 1.35%         |
|                          | FGFR3-TACC1      | 1         | 0.45%         |
|                          | FGFR3-GRPEL1     | 1         | 0.45%         |
|                          | CREBBP-CORO7-    |           |               |
|                          | PAM16            | 1         | 0.45%         |
|                          | CDKN2A-LINC01239 | 1         | 0.45%         |
|                          | BCR-ABL1         | 1         | 0.45%         |
|                          | CBL-EHD4         | 1         | 0.45%         |
|                          | ZDHHC14-ARID1B   | 1         | 0.45%         |
|                          | NBN-LOC101929709 | 1         | 0.45%         |
|                          | BCR-NTRK2        | 1         | 0.45%         |
|                          | TRIM9-RAD51B     | 1         | 0.45%         |
|                          | CYLD-WWOX        | 1         | 0.45%         |
|                          | NF1-RHOT1        | 1         | 0.45%         |
|                          | CTDSP2-AKT3      | 1         | 0.45%         |
|                          | ARFGEF2-PTPN1    | 1         | 0.45%         |
|                          | FAF1-ARID1A      | 1         | 0.45%         |
|                          | ARID1A-ZYG11A    | 1         | 0.45%         |
|                          | ARID1A-BSDC1     | 1         | 0.45%         |
|                          | TMEM165-PDGFR    | 1         | 0.45%         |
|                          | RB1-GUCY1B2      | 1         | 0.45%         |
|                          | YAP1-NTM         | 1         | 0.45%         |
|                          | PDGFR-MACROD2    | 1         | 0.45%         |
|                          | GTF2I-AOAH       | 1         | 0.45%         |
|                          | NOTCH1-CLN6      | 1         | 0.45%         |
|                          | CAV1-MET         | 1         | 0.45%         |
|                          | NXPH1-MET        | 1         | 0.45%         |
|                          | CAPRIN1-NTRK2    | 1         | 0.45%         |
|                          | SESN3-CNTN5      | 1         | 0.45%         |
|                          | BACH2-C6orf52    | 1         | 0.45%         |
|                          | JAK1-SGIP1       | 1         | 0.45%         |
|                          | MLH1-SRGAP3      | 1         | 0.45%         |
|                          | SPECC1L-NTRK2    | 1         | 0.45%         |
|                          | <b>Total</b>     | <b>35</b> | <b>15.91%</b> |
| Cervical cancer (N = 34) | FGFR2-RBMS3      | 1         | 2.94%         |
|                          | FNDC3A-RB1       | 1         | 2.94%         |
|                          | BIRC2-YAP1       | 1         | 2.94%         |
|                          | MSH2-EPCAM       | 1         | 2.94%         |
|                          | NCOR1-PIK3R6     | 1         | 2.94%         |

|                                  |                            |           |               |
|----------------------------------|----------------------------|-----------|---------------|
|                                  | <b>Total</b>               | <b>5</b>  | <b>14.71%</b> |
| Hepatocellular carcinoma (N = 9) | <i>ZNRF3-NF2</i>           | <b>1</b>  | <b>11.11%</b> |
|                                  | <b>Total</b>               | <b>1</b>  | <b>11.11%</b> |
| Colorectal cancer (N = 202)      | <i>ZFHX3-LINC01572</i>     | <b>1</b>  | <b>0.50%</b>  |
|                                  | <i>INPP4B-LOC101927636</i> | <b>1</b>  | <b>0.50%</b>  |
|                                  | <i>CLEC16A-GRIN2A</i>      | <b>1</b>  | <b>0.50%</b>  |
|                                  | <i>NF1-DNAJC7</i>          | <b>1</b>  | <b>0.50%</b>  |
|                                  | <i>ATR-ATP9A</i>           | <b>1</b>  | <b>0.50%</b>  |
|                                  | <i>ABHD17B-EPHA3</i>       | <b>1</b>  | <b>0.50%</b>  |
|                                  | <i>FGFR2-CEP55</i>         | <b>1</b>  | <b>0.50%</b>  |
|                                  | <i>RARA-TBCD</i>           | <b>1</b>  | <b>0.50%</b>  |
|                                  | <i>BMPR1A-WAPL</i>         | <b>1</b>  | <b>0.50%</b>  |
|                                  | <i>AXIN1-NPRL3</i>         | <b>1</b>  | <b>0.50%</b>  |
|                                  | <i>CNOT7-AKT3</i>          | <b>1</b>  | <b>0.50%</b>  |
|                                  | <i>ABCA5-SPOP</i>          | <b>1</b>  | <b>0.50%</b>  |
|                                  | <i>PTPN2-SPIRE1</i>        | <b>1</b>  | <b>0.50%</b>  |
|                                  | <i>SLC35E2B-SPEN</i>       | <b>1</b>  | <b>0.50%</b>  |
|                                  | <i>FUBP3-ABL1</i>          | <b>1</b>  | <b>0.50%</b>  |
|                                  | <i>ZC3H7A-CIITA</i>        | <b>1</b>  | <b>0.50%</b>  |
|                                  | <i>MYO5B-SMAD4</i>         | <b>1</b>  | <b>0.50%</b>  |
|                                  | <i>TPX2-ASXL1</i>          | <b>1</b>  | <b>0.50%</b>  |
|                                  | <i>ATP9A-ATR</i>           | <b>1</b>  | <b>0.50%</b>  |
|                                  | <i>RUNX1-</i>              |           |               |
|                                  | <i>ANKRD20A11P</i>         | <b>1</b>  | <b>0.50%</b>  |
|                                  | <i>KDM5C-ASMTL</i>         | <b>1</b>  | <b>0.50%</b>  |
|                                  | <i>MAMLD1-TCF7L2</i>       | <b>1</b>  | <b>0.50%</b>  |
|                                  | <b>Total</b>               | <b>22</b> | <b>10.89%</b> |
| Head and neck cancer (N = 177)   | <i>PTEN-LIPK</i>           | <b>1</b>  | <b>0.60%</b>  |
|                                  | <i>FGFR3-TACC3</i>         | <b>2</b>  | <b>1.20%</b>  |
|                                  | <i>FAT1-F11-AS1</i>        | <b>1</b>  | <b>0.60%</b>  |
|                                  | <i>YAP1-ROBO3</i>          | <b>1</b>  | <b>0.60%</b>  |
|                                  | <i>CREBBP-SYNPO2</i>       | <b>1</b>  | <b>0.60%</b>  |
|                                  | <i>ASXL1-NOL4L</i>         | <b>1</b>  | <b>0.60%</b>  |
|                                  | <i>TRAM2-RB1</i>           | <b>1</b>  | <b>0.60%</b>  |
|                                  | <i>MET-CALU</i>            | <b>1</b>  | <b>0.60%</b>  |
|                                  | <i>YAF2-RYBP</i>           | <b>1</b>  | <b>0.60%</b>  |
|                                  | <i>SND1-TP53BP1</i>        | <b>1</b>  | <b>0.60%</b>  |
|                                  | <i>NOTCH1-STKLD1</i>       | <b>1</b>  | <b>0.60%</b>  |
|                                  | <i>CDC42EP4-PAX5</i>       | <b>1</b>  | <b>0.60%</b>  |
|                                  | <i>KMT2C-FAM179B</i>       | <b>1</b>  | <b>0.60%</b>  |
|                                  | <i>VCAM1-RUNX1</i>         | <b>1</b>  | <b>0.60%</b>  |
|                                  | <i>BCL2-KDSR</i>           | <b>1</b>  | <b>0.60%</b>  |

|                                      | Total                 | 16 | 9.04% |
|--------------------------------------|-----------------------|----|-------|
| Non-small cell lung cancer (N = 751) | <i>EML4-ALK</i>       | 13 | 1.73% |
|                                      | <i>KIF5B-RET</i>      | 9  | 1.17% |
|                                      | <i>FGFR3-TACC3</i>    | 1  | 0.13% |
|                                      | <i>CAPZA2-MET</i>     | 1  | 0.13% |
|                                      | <i>KDM4C-PTPRD</i>    | 1  | 0.13% |
|                                      | <i>TPM3-NTRK1</i>     | 1  | 0.13% |
|                                      | <i>NT5M-NCOR1</i>     | 1  | 0.13% |
|                                      | <i>SELENOT-PAX5</i>   | 1  | 0.13% |
|                                      | <i>SMARCA4-DNM2</i>   | 1  | 0.13% |
|                                      | <i>CREBBP-ADCY9</i>   | 1  | 0.13% |
|                                      | <i>DICER1-KCNB1</i>   | 1  | 0.13% |
|                                      | <i>NF1-C4orf22</i>    | 1  | 0.13% |
|                                      | <i>CHEK2-NF2</i>      | 1  | 0.13% |
|                                      | <i>MDK-NRG1</i>       | 1  | 0.13% |
|                                      | <i>CNOT2-GRIN2A</i>   | 1  | 0.13% |
|                                      | <i>PICALM-EED</i>     | 1  | 0.13% |
|                                      | <i>ZDHHC18-ARID1A</i> | 1  | 0.13% |
|                                      | <i>FOXP1-KIF5A</i>    | 1  | 0.13% |
|                                      | <i>FOXP1-ROBO2</i>    | 1  | 0.13% |
|                                      | <i>GTF2I-GTF2IRD1</i> | 1  | 0.13% |
|                                      | <i>ABL1-FUBP3</i>     | 1  | 0.13% |
|                                      | <i>TET1-ADK</i>       | 1  | 0.13% |
|                                      | <i>MED1-CDK12</i>     | 1  | 0.13% |
|                                      | <i>FXR2-TP53</i>      | 1  | 0.13% |
|                                      | <i>MYC-PVT1</i>       | 1  | 0.13% |
|                                      | <i>CUX1-PAN3</i>      | 1  | 0.13% |
|                                      | <i>GLIS3-PAX5</i>     | 1  | 0.13% |
|                                      | <i>SLC3A2-NRG1</i>    | 1  | 0.13% |
|                                      | <i>IARS-FANCC</i>     | 1  | 0.13% |
|                                      | <i>RSBN1-PIK3R3</i>   | 1  | 0.13% |
|                                      | <i>CAMKMT-ALK</i>     | 1  | 0.13% |
|                                      | <i>YAF2-RYBP</i>      | 1  | 0.13% |
|                                      | <i>PTPRS-SLC38A10</i> | 1  | 0.13% |
|                                      | <i>MTAP-PTRD</i>      | 1  | 0.13% |
|                                      | <i>MECOM-PCOLCE2</i>  | 1  | 0.13% |
|                                      | Total                 | 55 | 7.32% |
| Small cell lung cancer (N = 14)      | <i>DTNB-ASXL2</i>     | 1  | 7.14% |
|                                      | Total                 | 1  | 7.14% |
| Melanoma (N = 138)                   | <i>RSF1-EED</i>       | 1  | 0.72% |
|                                      | <i>CDKN2A-NTM</i>     | 1  | 0.72% |
|                                      | <i>BPTF-BRIP1</i>     | 1  | 0.72% |

|                                          |                        |   |       |
|------------------------------------------|------------------------|---|-------|
|                                          | <i>AGAP3-BRAF</i>      | 1 | 0.72% |
|                                          | <i>YAP1-CNTN5</i>      | 1 | 0.72% |
|                                          | <i>AHCTF1-TSC1</i>     | 1 | 0.72% |
|                                          | <i>ARID4A-TENM4</i>    | 1 | 0.72% |
|                                          | <i>SPRED1-GPR176</i>   | 1 | 0.72% |
|                                          | <i>SLMAP-SOX9</i>      | 1 | 0.72% |
|                                          | <b>Total</b>           | 9 | 6.52% |
| Kidney cancer (N = 18)                   | <i>EIF3H-RAD21</i>     | 1 | 5.56% |
|                                          | <b>Total</b>           | 1 | 5.56% |
| Low grade glioma (N = 22)                | <i>ATG5-PARK2</i>      | 1 | 4.55% |
|                                          | <b>Total</b>           | 1 | 4.55% |
| Gastrointestinal stromal tumors (N = 24) | <i>ZFHX3-LINC01572</i> | 1 | 4.17% |
|                                          | <b>Total</b>           | 1 | 4.17% |
| Pancreatic adenocarcinoma (N = 186)      | <i>NF1-RHOT1</i>       | 1 | 0.54% |
|                                          | <i>INPP4B-BANK1</i>    | 1 | 0.54% |
|                                          | <i>SMARCA4-LSM14A</i>  | 1 | 0.54% |
|                                          | <i>SKIL-MECOM</i>      | 1 | 0.54% |
|                                          | <i>MAP3K5-ALK</i>      | 1 | 0.54% |
|                                          | <i>DIAPH3-BRCA2</i>    | 1 | 0.54% |
|                                          | <i>SMAD3-PLEKHG3</i>   | 1 | 0.54% |
|                                          | <b>Total</b>           | 7 | 3.76% |
| Gastric adenocarcinoma (N =33)           | <i>MECOM-PHC3</i>      | 1 | 3.03% |
|                                          | <b>Total</b>           | 1 | 3.03% |

**Supplemental Table S2.** Breakpoints and topology of recurrent unclassified fusions.

| Fusion               | Junction Reads | Breakpoint                                                                                   | In Frame | Topology      |
|----------------------|----------------|----------------------------------------------------------------------------------------------|----------|---------------|
| <i>BMPR1B-PDLIM5</i> | 3              | Intron 2 of <i>BMPR1B</i> with exon 13 of <i>PDLIM5</i><br>(chr4:95679219:+/chr4:95561427:+) | No       | Deletion      |
| <i>BMPR1B-PDLIM5</i> | 3              | Exon 10 of <i>BMPR1B</i> with exon 4 of <i>PDLIM5</i><br>(chr4:96073924:+/chr4:95496767:+)   | Yes      | Deletion      |
| <i>BMPR1B-PDLIM5</i> | 9              | Exon 1 of <i>BMPR1B</i> with exon 3 of <i>PDLIM5</i><br>(chr4:95679219:+/chr4:95444875:+)    | No       | Deletion      |
| <i>NIPBL-RAI14</i>   | 19             | Exon 1 of <i>NIPBL</i> with exon 4 of <i>RAI14</i><br>(chr5:36877280:+/chr5:34796044:+)      | No       | Deletion      |
| <i>NIPBL-PIEZO1</i>  | 9              | Exon 10 of <i>NIPBL</i> with exon 23 of <i>PIEZO1</i><br>(chr5:36985500:+/chr16:88794069:-)  | Yes      | Translocation |
| <i>NIPBL-SLC1A3</i>  | 5              | Exon 1 of <i>NIPBL</i> with exon 4 of <i>SLC1A3</i><br>(chr5:36877280:+/chr5:36608431:+)     | No       | Deletion      |
| <i>TTC6-MIPOL1</i>   | 4              | Exon 3 of <i>TTC6</i> with exon 13 of <i>MIPOL1</i><br>(chr14:38092208:+/chr14:37892060:+)   | No       | Deletion      |
| <i>TTC6-MIPOL1</i>   | 17             | Exon 5 of <i>TTC6</i> with exon 14 of <i>MIPOL1</i><br>(chr14:38152169:+/chr14:37969113:+)   | No       | Deletion      |

|                          |    |                                                                                                 |    |               |
|--------------------------|----|-------------------------------------------------------------------------------------------------|----|---------------|
| <i>MIPOL1-TTC6</i>       | 12 | Exon 13 of <i>MIPOL1</i> with exon 4 of <i>TTC6</i><br>(chr14:37892154:+/chr14:38149356:+)      | No | Deletion      |
| <i>PAK1-TEX14</i>        | 82 | Exon1 of <i>PAK1</i> with exon 2 of <i>TEX14</i><br>(chr11:77184597:-/chr17:56729363:-)         | No | Translocation |
| <i>PAK1-MMP20</i>        | 7  | Exon 1 of <i>PAK1</i> and exon 6 of <i>MMP20</i><br>(chr11:77184597:-/chr11:102477407:-)        | No | Deletion      |
| <i>PAK1-LOC101928896</i> | 4  | Exon 1 of <i>PAK1</i> and exon 4 of <i>LOC101928896</i><br>(chr11:77184597:-/chr11:78269310:+ ) | No | Inversion     |
